# Supplementary material
Source: PubMed Central journal article supplement (PMC6129122)
Supplement: jciinsight-3-121017-s111.pdf [file jciinsight-3-121017-s111.pdf]

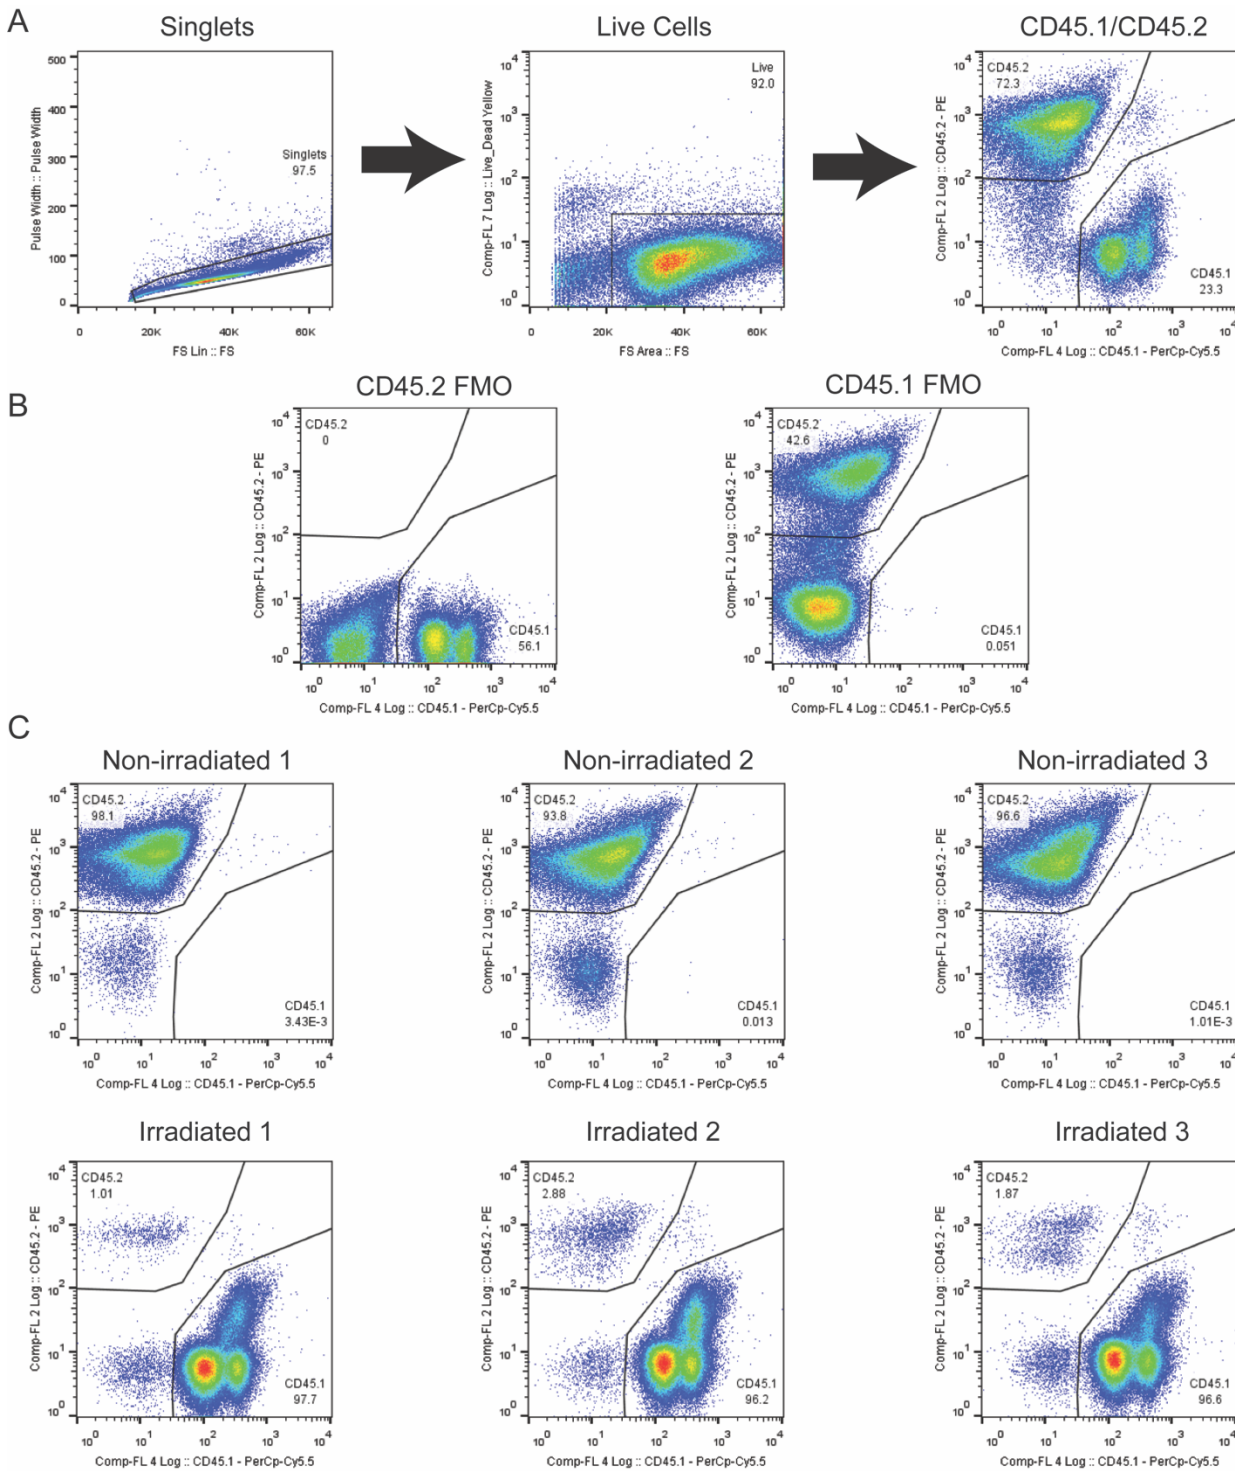

**Supplemental Figure 1: Effective bone marrow reconstitution following lethal irradiation.** A. Gating strategy for determining bone marrow engraftment efficiency. Cell aggregates and dead cells were removed in (left) and (middle). Donor and recipient cells were identified in this example using CD45.1 and CD45.2 specific antibodies (right). B. Fluorescent minus one (FMO) controls for CD45.1 and CD45.2. C. Percentage of CD45.1 and CD45.2 cells in three representative control and irradiated animals based on FMO.
